# Supplementary material for: Caring for Pregnant Patients With CKD---An Ethical Discussion of 5 Cases
Source: PubMed Central journal article supplement — Kidney Int Rep. 2021 Feb 26;6(5):1273–9. doi: 10.1016/j.ekir.2021.02.020 (PMC8116767; doi:10.1016/j.ekir.2021.02.020), 2021-02-26
Supplement: mmc1.pdf [file mmc1.pdf]

Supplemental Material:  
Search Strategy: Embase and medline

Ethics, Medical  
Ethics Clinical  
Ethics Committees  
Obstetrics  
High risk pregnancy/pregnancy  
MeSH + Chronic disease

- kidney
- cardiac
- cardiac congenital
- diabetes
- thyroid
- adrenal
- pituitary
- hypertension
- cancer
- lupus
- scleroderma
- vasculitis
- connective tissue disease
- arthritis
- antiphospholipid antibody syndrome
- pulmonary hypertension
- COPD
- Asthma
- interstitial lung disease
- cystic fibrosis
- HIV
- hepatitis
- cirrhosis
- tuberculosis
- Inflammatory bowel disease
- neurodegenerative
- multiple sclerosis
- Huntington
- Wilson's disease

Supplemental Table 1:

Articles discussing ethics of pregnancy in chronic medical conditions (excluding cancer, mental health and infectious diseases).

| Author & Year               | Type of Article            | Medical Condition                         | Ethical dilemma raised                                                                                                                                                                                                                                                                                                                                                                                                                                                                                                                                                                                                                                                                                                                                                                       |
|-----------------------------|----------------------------|-------------------------------------------|----------------------------------------------------------------------------------------------------------------------------------------------------------------------------------------------------------------------------------------------------------------------------------------------------------------------------------------------------------------------------------------------------------------------------------------------------------------------------------------------------------------------------------------------------------------------------------------------------------------------------------------------------------------------------------------------------------------------------------------------------------------------------------------------|
| Dresner, 1990 <sup>28</sup> | Case report and Discussion | Congenital Heart Disease                  | <ol style="list-style-type: none"> <li>1. How should physicians approach a patient with a pregnancy that is very high risk for maternal and fetal mortality who refuses to terminate the pregnancy?</li> <li>2. Is it ever ethical to “emergently” terminate a patient’s pregnancy when she has voiced the desire to continue the pregnancy regardless of the risk?</li> </ol>                                                                                                                                                                                                                                                                                                                                                                                                               |
| Nelson, 1997 <sup>17</sup>  | Discussion                 | Multiple Sclerosis                        | How should physicians counsel women with multiple sclerosis with regard to their reproductive decisions?                                                                                                                                                                                                                                                                                                                                                                                                                                                                                                                                                                                                                                                                                     |
| Levy, 1998 <sup>23</sup>    | Case report and discussion | Chronic Kidney Disease                    | <ol style="list-style-type: none"> <li>1. How should a physician approach counseling a woman with end-stage renal disease on dialysis regarding pregnancy?</li> <li>2. How should a physician approach counseling a woman with end-stage renal disease on dialysis who becomes pregnant?</li> </ol>                                                                                                                                                                                                                                                                                                                                                                                                                                                                                          |
| Ralph, 2000 <sup>26</sup>   | Case Report and discussion | Chronic Kidney Disease                    | <ol style="list-style-type: none"> <li>1. How should the health care team act if they believe that their patient’s pregnancy is too risky to continue, but their patient wants to continue the pregnancy?</li> <li>2. How can cultural, religious, and linguistic barriers to good communication between patient and health care team be breached?</li> </ol>                                                                                                                                                                                                                                                                                                                                                                                                                                |
| Baggot, 2004 <sup>25</sup>  | Discussion                 | Marfan Syndrome                           | <ol style="list-style-type: none"> <li>1. In counseling women with serious illness on the risks of pregnancy, is it ethical to only recommend abortion, rather than giving a balanced recommendation between abortion and non-abortive management or recommending non-abortive management?</li> <li>2. Is it ethical for a physician not to disclose their opinion on the ethicality of abortion and the right for a woman to choose whether or not to continue carrying a pregnancy?</li> </ol>                                                                                                                                                                                                                                                                                             |
| Piccoli, 2004 <sup>27</sup> | Case report and discussion | Chronic Kidney Disease (Renal Vasculitis) | <ol style="list-style-type: none"> <li>1. What are the responsibilities of the physician to the patient?</li> <li>2. How high is too high risk to go through with a pregnancy? How should this decision be made?</li> </ol>                                                                                                                                                                                                                                                                                                                                                                                                                                                                                                                                                                  |
| Ross, 2006. <sup>29</sup>   | Discussion                 | Solid Organ Transplant                    | <ol style="list-style-type: none"> <li>1. When should a physician caring for a patient with a transplant discuss issues with fertility with their patient?</li> <li>2. Is a child ethically wronged by being born to a woman with a transplant, due to the inherent risks of consequences in such a pregnancy?</li> <li>3. How should a physician counsel a patient with a transplant who is considering becoming pregnant?</li> <li>4. How should physicians consider the use of teratogenic drugs, weighing the risk to the fetus with the risk to the patient of omitting the drugs?</li> <li>5. Should a woman with a transplant who intentionally becomes pregnant with an unstable graft and consequently loses her transplant be given a lower priority for re-transplant?</li> </ol> |

|                                      |                            |                                                         |                                                                                                                                                                                                                                                                                                                                                                                                                                                                                                                                                                                                                                                                                                                                                                                                                                                                                                                       |
|--------------------------------------|----------------------------|---------------------------------------------------------|-----------------------------------------------------------------------------------------------------------------------------------------------------------------------------------------------------------------------------------------------------------------------------------------------------------------------------------------------------------------------------------------------------------------------------------------------------------------------------------------------------------------------------------------------------------------------------------------------------------------------------------------------------------------------------------------------------------------------------------------------------------------------------------------------------------------------------------------------------------------------------------------------------------------------|
|                                      |                            |                                                         | 6. Should women with transplants be provided Assisted Reproductive Technologies?                                                                                                                                                                                                                                                                                                                                                                                                                                                                                                                                                                                                                                                                                                                                                                                                                                      |
| Wexler, 2007 <sup>22</sup>           | Discussion                 | Chronic Progressive Pulmonary Disease (Cystic Fibrosis) | <p>1. Does a physician contravene their oath to do no harm if they help to facilitate a pregnancy that will be dangerous to the mother (as in the case of CF)? How should a physician balance the responsibility to respect reproductive autonomy with their obligation to pursue beneficence and non-maleficence for their patient?</p> <p>2. Does the physician caring for a pregnant woman with CF have a responsibility to consider the fetus' well-being? How will this affect the care given to the mother, for example, teratogenic drugs?</p> <p>3. How can the physician faced with caring for a pregnant woman with CF or a woman with CF who wishes to become pregnant best navigate the complexities of their relationship with their patient while adhering to their professional principles?</p> <p>4. Does discussing the risks of pregnancy in explicit detail contravene the patient's autonomy?</p> |
| Davison, 2007 <sup>16</sup>          | Discussion                 | Chronic Kidney Disease                                  | <p>1. What are the physician's ethical obligations of informed consent when caring for women with CKD?</p> <p>2. What are the physician's ethical obligations of counseling when caring for women with CKD?</p> <p>3. How should shortened life expectancy and reduced ability to care for a child be weighed against autonomy of the patient to choose to have a child if she wishes?</p> <p>4. Does a woman need to act in the best interests of her fetus?</p> <p>5. Is the right to reproductive freedom a positive or negative right?</p> <p>6. Should women with a kidney transplant who "recklessly" become pregnant despite the increased risk of graft loss and do suffer a loss of the transplant during the pregnancy be given a lower priority for re-transplantation?</p> <p>7. Should women with CKD be provided Assisted Reproductive Technologies?</p>                                                |
| Rivello, 2009 <sup>20</sup>          | Case report and discussion | Type 1 Diabetes                                         | <p>1. How should a physician approach counseling a patient with a chronic illness who is pregnant and whose pregnancy places their health at risk?</p> <p>2. How might this change in cases of poor education or comprehension?</p>                                                                                                                                                                                                                                                                                                                                                                                                                                                                                                                                                                                                                                                                                   |
| Morgan-Followell, 2014 <sup>15</sup> | Case Report and discussion | Multiple Sclerosis                                      | <p>1. What is the physician's duty to the patient?</p> <p>2. What is the physician's duty to the patient's child?</p> <p>3. How should the physician help the patient make medical decisions that are in her, her child's, and the family's best interests?"</p>                                                                                                                                                                                                                                                                                                                                                                                                                                                                                                                                                                                                                                                      |
